1 **Relational One Health: a more-than-biomedical framework for more-**  
2 **than-human health, and lessons learned from Brazil, Ethiopia, and**  
3 **Israel**

4  
5 Authors: Julianne Meisner<sup>1,2,3</sup>, Hilary McLeland-Wieser<sup>3</sup>, Elizabeth E. Traylor<sup>3</sup>, Barak Hermesh<sup>4</sup>,  
6 Tabata Berg<sup>5</sup>, Amira Roess<sup>6</sup>, Lauren Van Patter<sup>7</sup>, Anat Rosenthal<sup>4</sup>, Nadav Davidovitch<sup>4</sup>, Peter  
7 M. Rabinowitz<sup>1,3</sup>

8  
9 <sup>1</sup>Department of Global Health, University of Washington, Seattle, WA, USA

10 <sup>2</sup>Department of Epidemiology, University of Washington, Seattle, WA, USA

11 <sup>3</sup>Center for One Health Research, Department of Environmental and Occupational Health  
12 sciences, University of Washington, Seattle, WA, USA

13 <sup>4</sup>School of Public Health, Faculty of Health Sciences, Ben-Gurion University of the Negev, Be'er  
14 Sheva, Israel

15 <sup>5</sup>University of Brasilia, Brasilia, Brazil

16 <sup>6</sup>George Mason University, Fairfax, VA, USA

17 <sup>7</sup>Ontario Veterinary College, University of Guelph, Guelph, ON, Canada

18  
19 **ABSTRACT**

20 The One Health conceptual framework envisions human, animal, and environmental health as  
21 interconnected. This framework has achieved remarkable progress in the control of zoonotic  
22 diseases, but it commonly neglects the environmental domain, implicitly prioritizes human life  
23 over the life of other beings, and fails to consider the political, cultural, social, historical, and  
24 economic contexts that shape the health of multispecies collectives. We have developed a  
25 novel theoretical framework, Relational One Health, which expands the boundaries of One

26 Health, clearly defines the environmental domain, and provides an avenue for engagement with  
27 critical theory. We present a systematic literature review of One Health frameworks to  
28 demonstrate the novelty of Relational One Health, and to orient it with respect to other critically-  
29 engaged frameworks for One Health. Our results indicate that while Relational One Health  
30 complements several earlier frameworks, these other frameworks are either not intended for  
31 research, or for narrow sets of research questions. We then demonstrate the utility of Relational  
32 One Health for One Health research through case studies in Brazil, Israel, and Ethiopia.  
33 Empirical research which is grounded in theory can speak collectively, increasing the impact of  
34 individual studies and the field as a whole. One Health is uniquely poised to address several  
35 wicked challenges facing the 21<sup>st</sup> century—climate change, pandemics, neglected zoonoses,  
36 and biodiversity collapse—and a unifying theoretical tradition is key to generating the evidence  
37 needed to meet these challenges.

38

## 39 **HIGHLIGHTS**

- 40 • One Health views human, animal, and environmental health as interconnected
- 41 • Biomedical reductionism in One Health has resulted in a focus on human health threats  
42 from animals
- 43 • The environmental domain and more-than-biomedical contexts are commonly ignored in  
44 One Health
- 45 • Relational One Health is a new theoretical framework which addresses these limitations
- 46 • This theoretical framework is relevant to all One Health research, increasing the field's  
47 impact

48

## 49 **BACKGROUND**

50 The COVID-19 pandemic has increased interest in institutionalizing a One Health approach  
51 to prevent future pandemics. This is rooted in a growing consensus that zoonotic emergence is  
52 caused by human-environment relations grounded in colonial-capitalism and resulting in habitat  
53 loss and climate change, and thus likely to continue. At the same time, social movements  
54 accelerated by the pandemic have collided with the undeniable fact that infectious diseases are  
55 not just biomedical phenomena: rather, the transmission and impacts of pathogens follow long-  
56 established gradients of social difference. These gradients are politically, historically, and  
57 geographically contextual: their deep historical roots have been perpetuated and upheld by  
58 social, economic, and political structures, and today manifest as socioeconomic inequities.  
59 Within One Health, white papers and reports published by multilateral agencies and  
60 commissions have reflected this growing acceptance that One Health cannot occupy a solely  
61 biomedical position. Yet to our knowledge, this awareness is not coupled with a suitable  
62 theoretical framework for One Health research.

63 The One Health High Level Expert Panel (OHHLEP) was convened in 2021 by the  
64 Quadripartite partners—Food and Agriculture Organisation of the UN (FAO), UN Environment  
65 Programme (UNEP), World Health Organisation (WHO) and World Organization for Animal  
66 Health (WOAH)—to support development of the Quadripartite’s One Health Joint Plan of Action.  
67 OHHLEP’s first task was to develop a new, action-oriented definition of One Health, from the  
68 many dozens of definitions in circulation (1). Indeed, OHHLEP’s new definition is certainly more-  
69 than-biomedical, supported by key underlying principles which emphasize “sociopolitical and  
70 multicultural parity, socioecological equilibrium, and epistemological equity.” However, it is  
71 intended to guide policy, not research. Conversely, the Lancet One Health Commission  
72 published a new definition of One Health in 2020 focused on research (2). While there are  
73 more-than-biomedical dimensions to the Commission’s definition, they do not extend to the  
74 knowledge generating process itself, rather beginning when research is translated into policy:

75 “...evidence generation must be used to drive context-driven governance, progressive policy,  
76 and legislation that are sensitive to gender, community,  
77 equity, and ethics.”

78 Beyond biomedical reductionism, One Health has  
79 also been criticized for failing to define the  
80 environmental domain, or ignoring it entirely. The  
81 original vision for One Health integrated human, animal,  
82 and environmental health with other social science  
83 disciplines: a truly holistic “more-than-human”  
84 approach. In practice, One Health has largely stopped  
85 at integrating human and animal health, focused on  
86 zoonotic diseases within the veterinary and healthcare  
87 sectors. Further, donor priorities have led to an implicit  
88 hierarchy which places humans over other beings.  
89 Animals are often viewed as “exposures” or threats to  
90 human health, rather than health bearers in their own

Box 1: Key definitions

**One Health\*:** A collaborative approach to attain optimal health for people, domestic animals, wildlife, plants, and our environment.

**EcoHealth\*:** A movement which recognizes the inextricable dynamic linkages between the health of all species and their environments.

**Planetary Health\*:** Achievement of the highest attainable standard of health, wellbeing, and equity worldwide through judicious attention to human systems and the Earth’s natural systems that define the safe environmental limits within which humanity can flourish.

**Ecosystems:** Communities of interacting beings, biotic and abiotic.

**Environment:** The biophysical, social, cultural, political, historical, and economic contexts (systems, structures, and circumstances) in which humans, animals, and ecosystems exist.

*\*Adapted from Lerner and Berg, 2017*

91 regard, and exceptions to this are usually framed in terms of agricultural productivity and  
92 economic losses, and thus still reflect human priorities. It is quietly accepted that this neglect of  
93 the environmental domain in One Health motivated the advent of the Planetary Health  
94 movement in 2014 (3), however Planetary Health takes an anthropocentric view of health, and  
95 thus aligns more with Global Health than with One Health. EcoHealth, by contrast, is interested  
96 in the wellbeing of all living creatures. There is significant overlap between EcoHealth and One  
97 Health, however One Health focuses on the health of individuals, while EcoHealth focuses on  
98 aggregations (4) (Box 1). In 2017 the COHERE guidelines were published to encourage better  
99 representation of the environmental domain in One Health papers (5), and in 2020 the Tripartite  
100 (WHO, FAO WOA) expanded to include the UNEP as the new Quadripartite. These shifts are

101 accompanied by attempts to better define the environment (plants, soil, water, etc.) within One  
102 Health policy statements and white papers. We argue, however, that One Health's  
103 conceptualization of the environment has yet to crystallize, despite these efforts. The  
104 environment can be defined very broadly—all elements of the physical, cultural, social, and  
105 political milieu—or narrowly—the immediate built environment and its hazards—and thus this  
106 omission is non-trivial.

107 We introduce Relational One Health (Figure 1) as a novel, critically-engaged theoretical  
108 framework which seeks to clarify how the environment is conceptualized within One Health,  
109 challenge One Health researchers to think beyond biomedical dimensions and determinants of  
110 multispecies health, and subvert the implicit prioritization of humans over other living beings.  
111 Under this framework, the distribution of health is a collective over and within humans, non-  
112 human animals (“animals”, for simplicity), and ecosystems, each of which are health bearers.  
113 Ecosystems subsume animals, and animals subsume humans, reflecting the relationality  
114 between them. These health bearers share a common environment which determines the  
115 distribution of health and has social, cultural, historical, political, economic, and biophysical  
116 dimensions. This framework revisits One Health's initial holistic vision, challenging the  
117 constraints that have settled around One Health over the past few decades. It also provides  
118 foundation for critically-engaged scholarship within One Health, as the environmental domain  
119 cannot be fully examined or understood if systems of power and oppression, which ultimately  
120 shape the circumstances that determine health, are ignored. We first present our findings from a  
121 systematic review of One Health frameworks. We then detail the Relational One Health  
122 theoretical framework's assumptions and origins, and conclude by presenting brief case studies  
123 from Brazil, Israel, and Ethiopia, from the lens of the Relational One Health theoretical  
124 framework.

## 125 **METHODS**

126 This PRISMA checklist was used to guide this review and its presentation (6).

127 *Objective*

128           The objective of this systematic review was to evaluate the need for a novel, politically-  
129 engaged theoretical framework for One Health, effectively ensuring that Relational One Health  
130 doesn't duplicate other efforts. We sought to find One Health conceptual models or theoretical  
131 frameworks, hereafter referred to as "frameworks," and evaluate the extent to which they  
132 engage with more-than-biomedical definitions of health.

133 *Search strategy*

134           Searches were conducted in PubMed and Web of Science. Results were imported into  
135 Research Rabbit (7) to identify similar publications not found in these databases. Search terms,  
136 developed by EJT and JM in collaboration with a health sciences librarian, were:

- 137       • PubMed: "one health"[Title/Abstract] AND ("framework"[Text Word] OR "model"[Text  
138       Word] OR "theor\*"[Text Word])
- 139       • Web of Science: ALL=("One Health" AND ("framework" or "model" or "theor\*"))

140 *Selection of publications*

141           Two authors with expertise in One Health [EET and HMW] selected publications, with a  
142 third author [JM] consulted when there was uncertainty whether a publication should be  
143 included or excluded. Publication titles were subjected to two rounds of reviews by EJT, with  
144 selected publications imported into Research Rabbit between these two rounds, and  
145 publications found in Research Rabbit incorporated into the second round of title review. Full-  
146 text review was then conducted by HMW and JM to select the final publications to be reviewed  
147 according to the following criteria:

148 Inclusion criteria:

- 149       • English language
- 150       • Full text available

- 151 • Title contains the following terms: (“framework” or “model” or “system”) and (“One  
152 Health” or “EcoHealth”)
- 153 • Framework reconceptualizes and/or re-theorizes One Health (*what is One Health*)
- 154 • Framework includes more-than-biophysical contexts for health

155 Exclusion criteria:

- 156 • Title includes the term “impact”
- 157 • Publication focuses on a specific pathogen or disease
- 158 • Framework focuses on implementation (*how to do One Health*)

159

160 All publications were stored in a shared Zotero folder, with subfolders used to identify  
161 database(s) of origin and review fate (inclusion/exclusion).

162 *Data extraction*

163 Once the final selection of publications had been established, HMW extracted data from each  
164 included publication into an Excel matrix with the following fields, meeting bi-weekly with JM to  
165 discuss the evolution of her findings and resolve conflicts:

- 166 • Metadata: title, first author, year published, journal
- 167 • Summary of the framework presented
- 168 • Framework is presented as novel conceptualization of One Health [Y/N]
- 169 • Framework includes sociocultural contexts for health [Y/N]
- 170 • Framework includes political contexts for health [Y/N]
- 171 • Framework includes economic contexts for health [Y/N]
- 172 • Framework includes other more-than-biophysical contexts for health [free text]
- 173 • Framework is critically-engaged [Y/N]

174 We define critically-engaged frameworks as those which discuss or reference critical theory  
175 (anti-racist, decolonial, feminist, posthumanist, and others), typically with a lens towards justice  
176 and rights.

177 In this review, we are seeking to capture the same directionality implied by Relational  
178 One Health. For example, we are interested in frameworks which examine political economies  
179 as causes of multispecies disease distribution, not frameworks for drawing economic arguments  
180 in favor of One Health, or frameworks for identifying policies and institutional structures required  
181 for successful implementation of One Health.

## 182 **RESULTS**

### 183 Literature review

184 PubMed was searched on February 2<sup>nd</sup>, 2023, and Web of Science on February 23<sup>rd</sup>, 2023,  
185 producing 1,171 and 1,294 results, respectively. After the first round of title review, 94  
186 publications remained. These were imported into Research Rabbit, which found 30 additional  
187 publications. The second round of title review excluded an additional 95 publications, leaving 29  
188 for full-text review. Following full-text review an additional 10 publications were identified from  
189 the reference lists, and an additional 31 were excluded. A total of eight publications presented  
190 new definitions, theoretical frameworks, or conceptual models for One Health which considered  
191 health as a more-than-biomedical phenomenon (i.e., shaped by more-than-biophysical contexts)  
192 (Figure 2). All were published since 2009, with the majority published after 2018.

193 All publications considered all of the more-than-biomedical contexts we evaluated  
194 (sociocultural, political, and economic), thus Table 1 summarizes the framework briefly, and  
195 indicates whether the framework was critically-engaged and provided a clear definition of the  
196 environmental domain. Of the frameworks labeled as not critically-engaged, several (8,9)  
197 contained text which indicated the authors' openness towards critical theory principles,  
198 particularly posthumanism and decolonial theory.



199 Baquero presents *One Health of Peripheries* (10), which draws from the perspective of  
200 Latin American collective health and more-than-human biopolitics. Central to Baquero's  
201 framework are marginalizing apparatuses, which legitimize exploitation against living beings  
202 on the other side of the margins. Latin American collective health addresses power hierarchies  
203 in the social determination of health, but does not consider animals as health bearers and  
204 therefore reproduces marginalizing apparatuses that create more-than-human health inequities.  
205 Conversely, *One Health* views animals as health bearers, but largely ignores social processes  
206 in both theory and research. Baquero reviews the history of animalization, domestication,  
207 colonialization, and slavery to demonstrate that marginalization is a political process which is  
208 common not only to humans, but to other animals and the environment, calling for multispecies  
209 intersectionality. However, *One Health of Peripheries* is intended to be a discursive tool, rather  
210 than a foundation for research, and no figure or visual is presented.

211 Hardy & Standley (11) review the symbiotic relationship between *One Health* and  
212 intersectional feminist thought, which originated in Black feminism and has been applied to  
213 many overlapping systems of power. General biological classification which was popularized  
214 during the Enlightenment era formed the basis for racial classification established during the  
215 expansion of Western colonialism. This system of classification led to the historical isolation of  
216 health sectors which *One Health* seeks to address, and to the false binaries that *One Health*  
217 (i.e., animal vs. human) and feminist and Queer theory (i.e., man vs. woman) seek to  
218 decompose. This doesn't mean categories are discarded, but rather their points of intersection  
219 are studied and viewed as products of culture, rather than inflexible laws of nature.

220 The framework presented by Lerner & Berg (12) challenges normative definitions of both  
221 health and non-human animals, the latter challenge justified by the huge variety of animal life  
222 forms. Health is presented as an individual-level construct: individuals nest in populations, and  
223 population-level health is simply the use of statistics to measure the health of individuals that  
224 comprise the population (public health for humans, population health/herd health for animals).

225 Populations then nest in ecosystems, which the authors appear to treat as a health bearer  
226 though this is not stated explicitly. A new definition of health that applies to all animals, including  
227 humans, is comprised of physiological health, mental health, and balance theory. Similar to  
228 Baquero, they consider animals and humans to be part of the same multispecies community.  
229 However, Lerner & Berg are focused on definitions, not determinants, of health.

230         Rock et al. (13) use the concept of a syndemic—two or more afflictions that interact  
231 synergistically to result in an excess burden of disease—to re-conceptualize One Health  
232 preventions. A syndemic orientation focuses on connections between health problems when  
233 developing health policies, aligning with other values for social change to achieve health for all.  
234 Using the example of the mental health impacts of widespread animal culls during the 2001 foot  
235 and mouth disease outbreak in the UK, the authors demonstrate that prevention strategies  
236 should consider not just the need to control infections, but also the economic, cultural,  
237 emotional, and political principles that shape the “entwining of biology with social systems.”  
238 While this framework is presented as a tool for examining the impacts of policies and  
239 interventions and rather than determinants of health, its theoretical foundation couples nicely  
240 with the Relational One Health theoretical framework. However, it does not provide an explicit  
241 definition of the environment.

242         Sleeman et al. (14) propose a systems-based harm-reduction approach to One Health  
243 interventions, conceptualized through a One Health impact pyramid. At the base of the pyramid  
244 are socioeconomic and environmental determinants of health, which act together to underpin  
245 decisions and interventions. The authors emphasize that actions should be prioritized here for  
246 long-term sustainability, but their examples highlight very proximal risk factors and similarly  
247 proximal solutions: e.g., providing alternative sources of income for mining communities during  
248 high-risk periods for Marburg transmission so workers don't enter caves. The environment is  
249 clearly defined in this framework: humans, wildlife, and domestic animals are health bearers,

250 which share an environment defined by ecosystem health and environmental quality  
251 (presumably air, water, soil, etc.).

252 Wallace et al.'s Structural One Health (15) critiques analyses of risk factors for pathogen  
253 emergence which only examine conditions in geographic proximity to the emergence event, and  
254 the implicit assumption of neoliberalism as the status quo in such analyses. In contrast,  
255 Structural One Health hypothesizes that global capital accumulation is a key determinant of  
256 ecosystem health, and pathogen emergence in turn. This framework empirically formalizes the  
257 connections between global circuits of capital, deep-time histories, and cultural infrastructure,  
258 which together result in landscape changes and shifts in wildlife, agricultural, and human health.  
259 The authors present a schematic for their model in the form of a pyramid, with Structural One  
260 Health at the bottom (comprising the broadest context of disease) and emergency medicine at  
261 the top, and discuss several applications of the framework which are not yet published.  
262 However, Structural One Health is a framework for a particular type of One Health research  
263 question (e.g., focused on distal, structural causes), while Relational One Health is intended to  
264 be a tool for all One Health investigations (e.g., encompasses structural, distal, and proximal  
265 causes), and thus serves a broader purpose.

266 Woldehanna and Zimicki (8) present a framework for systematically examining the  
267 proximate determinants of human-animal contact, with the goal of considering socioecological  
268 factors that can contribute to disease emergence at the local level. They refer to this as an  
269 "expanded One Health model," which theorizes that different people living in the same location,  
270 affected by the same large-scale drivers, may be at differential risk of spillover due to social  
271 factors. Categories of determinants the authors examined include biological characteristics of  
272 individuals; social characteristics of individuals, households, and communities, including norms,  
273 livelihood systems, and settlement patterns; and at the public policy level, local and international  
274 governance and politics.

275 Finally, Zinsstag et al. (9) present the “Health in Socio-ecological Systems” framework,  
276 an extension of One Health, EcoHealth, systems biology, and socioecological systems  
277 conceptual thinking. Humans and animals are health bearers existing in a socioecological  
278 continuum: animals, including wildlife, are part of the social systems of humans, and part of the  
279 environment. The authors present a reciprocal relationship between health and social, cultural,  
280 economic, and political contexts: these contexts shape health, and are also determined by  
281 health.

### 282 Relational One Health

283 Despite the promise of One Health, its application has been criticized as reductionist in  
284 scope with inter-disciplinary collaborations largely limited to veterinary and healthcare sectors  
285 and focused on laboratory methods and surveillance (16). While recent years have seen an  
286 increase in more-than-biomedical frameworks for One Health, as reviewed here, these  
287 frameworks are either not well-suited to research, or deal only with a specific type of research  
288 question. Further, many do not explicitly define the environmental domain (Table 1).

289 We developed the Relational One Health (Figure 1) theoretical framework to expand the  
290 scope of One Health research to include macrosocial determinants of multispecies health,  
291 coupled with a clear definition of the environmental domain as distinct from ecosystems.  
292 Relational One Health was inspired by several earlier One Health frameworks, particularly  
293 Baquero’s One Health of Peripheries (10), which inspired the subsumption in Figure 1, as well  
294 as Wallace et al.’s Structural One Health (15) and Hermesh et al.’s Political One Health (17).  
295 Relational One Health also draws inspiration from Kreiger’s ecosocial theory of disease  
296 distribution (18), which combines social, ecological, and historical context with a postulated  
297 mechanism for their influence on health, termed embodiment.

298 We will now present three case studies which use the Relational One Health theoretical  
299 framework to guide research. At the study development stage, this theoretical framework can be  
300 used to develop conceptual models, which are then linked to data collection and analysis plans.

301 Later in the research lifecycle, the Relational One Health theoretical framework can be used to  
302 contextualize results, triangulate findings with other literature (including outside of the  
303 biomedical sciences), and identify directions for future research.

304 *Case study 1: Emancipatory land rights and arboviruses in Brazil* Emancipatory land rights  
305 is defined as secure land control and land access for communities facing dispossession of their  
306 land. This is the focus of a research project we are implementing among Quilombola  
307 communities in the midwest of Brazil, the descendants of individuals who escaped slavery  
308 among Brazil's regional biomes. Figure 3 presents a conceptual model developed from the  
309 Relational One Health theoretical framework to guide this research. Land control is a facet of  
310 the environment which itself has political and historical determinants, namely land policy,  
311 constitutional rights for Quilombola peoples, and the history of emancipation and rural  
312 settlement. Land control influences ecosystem preservation through social and economic  
313 intermediates, with weak land rights allowing conflict within and between communities to  
314 manifest as ecosystem destruction through capitalist exploitation of the land. This ecosystem  
315 destruction increases vectorial capacity and drives arbovirus transmission, an embodiment of  
316 land control. Animals, humans, and ecosystems (indicated by colored shading) are all health  
317 bearers, and insect vectors are both a component of ecosystems, and also comprise the  
318 biophysical environment within which animals and humans exist.

319 *Case study 2: Distrust and brucellosis in Israel* Case Study 2 examines human-animal  
320 contact networks as an intermediary between larger social contexts and zoonotic disease  
321 transmission (Figure 4). Specifically, distrust of formal institutions (veterinary, agricultural, public  
322 health, economic, etc.) among Bedouin communities in southern Israel is caused by current and  
323 historical political, racial/ethnic, and economic contexts. These distal contexts intertwine with  
324 more proximal social and economic forces which determine the structure and stability of human-  
325 animal and animal-animal contact networks, for instance herd size and husbandry, purchase of  
326 animals and animal products from the West Bank, household size, distribution of husbandry

327 tasks within the household, etc. These contact networks in turn facilitate the transmission of  
328 pathogens between animals and humans including *Brucella*, a major cause of human and  
329 livestock morbidity in Israel.

330 *Case study 3: MERS-CoV in Ethiopia* Case Study 3 examines the impact of human-  
331 domesticated animal, domesticated animal-wildlife, and human-wildlife relationships and  
332 interaction on zoonotic disease emergence and transmission in the larger social, cultural,  
333 economic, political and environmental contexts. Historically, semi-pastoralists of specific  
334 ethnicities dominated the camel markets and most camel trade was for local and national  
335 consumption. The demand for camel products by wealthier countries increased exponentially  
336 following MERS-CoV outbreaks in the Arabian peninsula. In response semi-pastoralists have  
337 faced increased demand for their services, and are competing with other ethnicities perceived to  
338 have social, and economic advantages. Concurrent with these shifting market forces, changes  
339 in precipitation and temperature due to climate change are leading herders to graze camels in  
340 protected areas, bringing them into contact with wildlife and increasing the risk of disease  
341 transmission—MERS-CoV and others—between humans, camels and wildlife. Finally, camel  
342 husbandry has become dangerous in some areas due to political and cultural unrest.

### 343 **DISCUSSION**

344 We present here a systematic review of One Health conceptual models and theoretical  
345 frameworks which seek to re-conceptualize One Health in a more-than-biomedical light. We  
346 then place the findings of this review in the context of Relational One Health, and review its  
347 theoretical foundations. Finally, we present three case studies which operationalize the  
348 Relational One Health theoretical framework for research.

349 Recent decades have seen an increase in critically-engaged One Health frameworks  
350 which reject a reductionist view of health as a solely biomedical phenomenon. The Relational  
351 One Health theoretical framework is in many ways complementary with these earlier  
352 frameworks, being inspired by One Health of Peripheries (10) and Structural One Health (15),

353 and being well-suited to expanding the application of the syndemic approach proposed by Rock  
354 et al. (13), and to application of the methods proposed by Woldehanna et al. (8). However, none  
355 of these earlier frameworks have succeeded in gaining broad traction within the One Health  
356 community. There are several likely explanations for this that originate in the dispersed nature of  
357 One Health, and its disciplinary foundations within fields that are proudly “purely scientific,” and  
358 may not be open to critical theory. However, there are also explanations that originate in the  
359 frameworks themselves: namely, these frameworks were either not intended for research, or  
360 only a select type of research question. We present the Relational One Health theoretical  
361 framework as a valuable addition, which can guide all One Health inquiries interested in  
362 knowledge generation regarding the determinants of multispecies health. As demonstrated  
363 through our case studies, this framework can be used to develop conceptual models which can  
364 guide and be validated through research.

365         Importantly, Relational One Health does not suggest that research which is solely  
366 biomedical in scope is not One Health. In such cases, Relational One Health can still be used to  
367 triangulate findings across research studies and identify gaps for further research. Relational  
368 One Health also does not prescribe a certain definition of health, which could encompass the  
369 absence of a given disease, the presence of social wellbeing or political agency, the  
370 maintenance of biodiversity, etc. The implication of this is that Relational One Health can serve  
371 as the theoretical foundation for all One Health inquiry, increasing the impact of One Health  
372 research by orienting the findings of individual studies within a shared theoretical framework.  
373 Relatedly, despite its many problems, we choose to retain the term “environment” in this  
374 framework—where it refers to the contexts in which humans, animals, and ecosystems reside  
375 and embody—to align with existing definitions of One Health, signaling that this framework is  
376 intended to be an addition to the discipline, rather than a departure from it. This framework can  
377 also serve as the basis for a more holistic examination of the intersection between One Health

378 and critical social theory such as feminist care theory, posthumanism, and anti-colonial theory,  
379 the subject of a recent review by Van Patter et al. (19).

380         The wicked problems to which One Health is most suited—pandemics of zoonotic origin,  
381 neglected zoonotic diseases, climate change, and biodiversity collapse—cannot be addressed  
382 through solely biomedical counter measures or ministry of health-level programs; instead, they  
383 require large-scale political and social change. Empirical research can play a role in creating  
384 social change, but research holds greater value and impact when it can speak holistically, rather  
385 than in independent parts, and a shared theoretical foundation is critical to achieving this end.  
386 This approach has far reaching consequences, from the way the research questions are  
387 framed, to who is included in the research team, and which research traditions and languages  
388 are integrated and how. With climate change and pandemics looming, the scientific community  
389 will have to adapt its scientific tools and theories not only to the rapid pace of events, but also to  
390 the interrelatedness of phenomena surrounding us, and Relational One Health positions One  
391 Health to lead this charge.

392



393 **REFERENCES**

- 394 1. One Health High-Level Expert Panel (OHHLEP), Adisasmito WB, Almuhairi S, Behravesh  
395 CB, Bilivogui P, Bukachi SA, et al. One Health: A new definition for a sustainable and  
396 healthy future. Dvorin JD, editor. PLOS Pathog. 2022 Jun 23;18(6):e1010537.
- 397 2. Amuasi JH, Lucas T, Horton R, Winkler AS. Reconnecting for our future: The Lancet One  
398 Health Commission. The Lancet. 2020 May;395(10235):1469–71.
- 399 3. Horton R, Beaglehole R, Bonita R, Raeburn J, McKee M, Wall S. From public to planetary  
400 health: a manifesto. The Lancet. 2014 Mar;383(9920):847.
- 401 4. Lerner H, Berg C. A Comparison of Three Holistic Approaches to Health: One Health,  
402 EcoHealth, and Planetary Health. Front Vet Sci. 2017;4:163.
- 403 5. Davis MF, Rankin SC, Schurer JM, Cole S, Conti L, Rabinowitz P, et al. Checklist for One  
404 Health Epidemiological Reporting of Evidence (COHERE). One Health. 2017 Dec;4:14–21.
- 405 6. Page MJ, McKenzie JE, Bossuyt PM, Boutron I, Hoffmann TC, Mulrow CD, et al. The  
406 PRISMA 2020 statement: an updated guideline for reporting systematic reviews. BMJ. 2021  
407 Mar 29;n71.
- 408 7. ResearchRabbit [Internet]. [cited 2023 Sep 14]. ResearchRabbit. Available from:  
409 <https://www.researchrabbit.ai>
- 410 8. Woldehanna S, Zimicki S. An expanded One Health model: integrating social science and  
411 One Health to inform study of the human-animal interface. Soc Sci Med 1982. 2015  
412 Mar;129:87–95.
- 413 9. Zinsstag J, Schelling E, Waltner-Toews D, Tanner M. From “one medicine” to “one health”  
414 and systemic approaches to health and well-being. Prev Vet Med. 2011 Sep 1;101(3):148–  
415 56.
- 416 10. Baquero OS. One Health of Peripheries: Biopolitics, Social Determination, and Field of  
417 Praxis. Front Public Health [Internet]. 2021 [cited 2023 Jun 21];9. Available from:  
418 <https://www.frontiersin.org/articles/10.3389/fpubh.2021.617003>
- 419 11. Hardy E, Standley CJ. Identifying intersectional feminist principles in the One Health  
420 framework. One Health Amst Neth. 2022 Dec;15:100404.
- 421 12. Lerner H, Berg C. The concept of health in One Health and some practical implications for  
422 research and education: what is One Health? Infect Ecol Epidemiol. 2015 Jan 1;5(1):25300.
- 423 13. Rock M, Buntain BJ, Hatfield JM, Hallgrímsson B. Animal–human connections, “one health,”  
424 and the syndemic approach to prevention. Soc Sci Med. 2009 Mar;68(6):991–5.
- 425 14. Sleeman JM, Richgels KLD, White CL, Stephen C. Integration of wildlife and environmental  
426 health into a One Health approach. Rev Sci Tech Int Off Epizoot. 2019 May;38(1):91–102.

- 427 15. Wallace RG, Bergmann L, Kock R, Gilbert M, Hogerwerf L, Wallace R, et al. The dawn of  
428 Structural One Health: a new science tracking disease emergence along circuits of capital.  
429 Soc Sci Med. 2015;
- 430 16. Hermesh B, Rosenthal A, Davidovitch N. Rethinking “One Health” through Brucellosis:  
431 ethics, boundaries and politics. Monash Bioeth Rev. 2019 Oct;37(1–2):22–37.
- 432 17. Hermesh B, Rosenthal A, Davidovitch N. The cycle of distrust in health policy and behavior:  
433 Lessons learned from the Negev Bedouin. Clegg S, editor. PLOS ONE. 2020 Aug  
434 20;15(8):e0237734.
- 435 18. Krieger N. Ecosocial Theory of Disease Distribution: Embodying Societal & Ecologic  
436 Context. In: Epidemiology and the People’s Health. New York, NY: Oxford University  
437 Press; 2011. p. 202–35.
- 438 19. Van Patter LE, Linares-Roake J, Breen AV. What does One Health want? Feminist,  
439 posthuman, and anti-colonial possibilities. One Health Outlook. 2023 Mar 10;5(1):4.
- 440

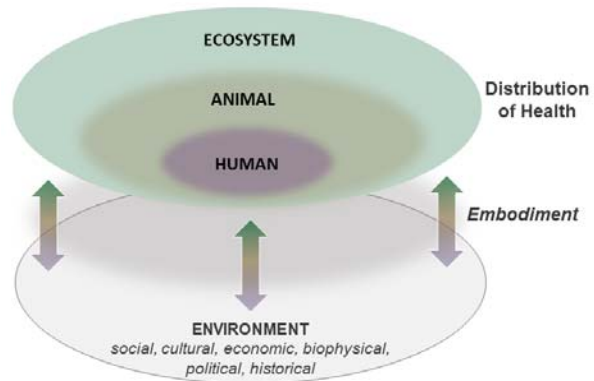

**Figure 1: The Relational One Health theoretical framework.** The distribution of health is a collective over and within human, animal, and ecosystem health, with each component recognized as health bearers. Humans are subsumed by animals, and animals are subsumed by ecosystems. These biotic and abiotic beings share a common environment which has economic, biophysical, political, historical, and social, cultural dimensions. This shared environment influences health through the active, reciprocal process of embodiment, through which health bearers interface with and influence their environment.

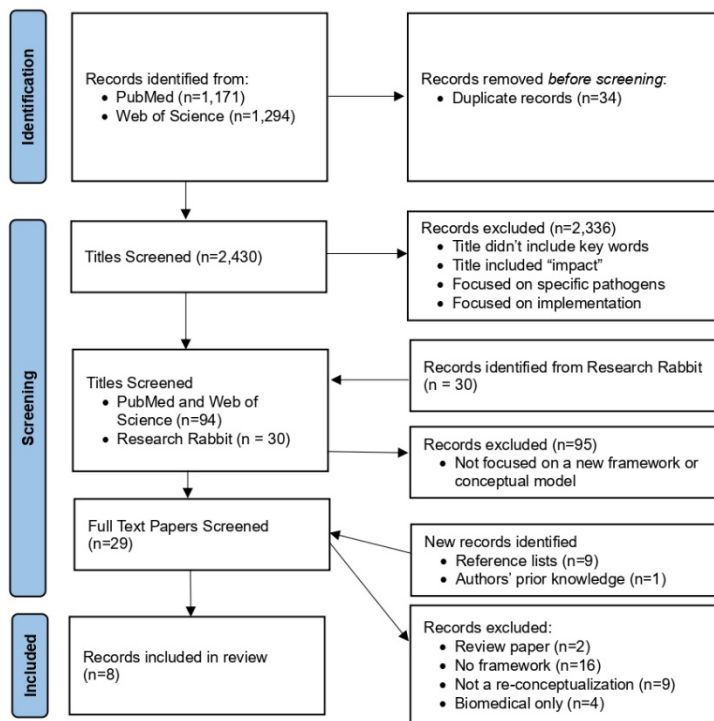

**Figure 2:** Inclusion flow chart

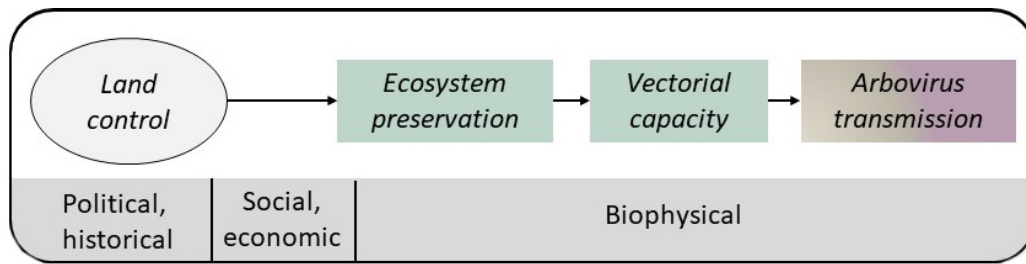

**Figure 3** Conceptual model for Case Study 1. Land control is a component of the environment which has political (land policy, Quilombola rights) and historical (emancipation, rural settlement) antecedents, and shapes the health of ecosystems (green shading), and animals and humans (beige/purple gradient), embodied through the transmission of arboviruses. The effect of land control on ecosystem preservation has social (conflicts within and between communities) and economic (capitalist exploitation of land) determinants. The ecosystem (green shading), including the vectors it contains, is both a health bearer and comprises the biophysical environment which shapes animal (beige shading) and human (purple shading) health.

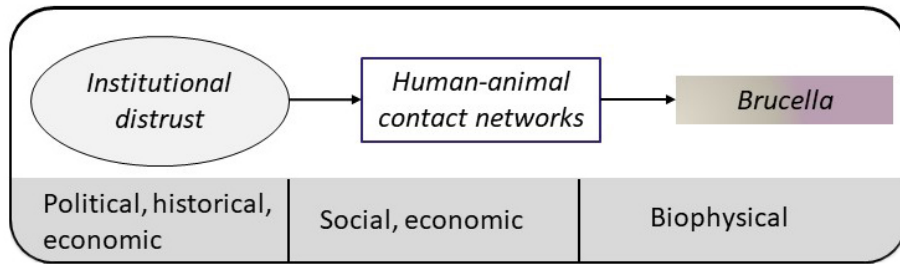

**Figure 4** Conceptual model developed for Case Study 2. Among Bedouin communities in southern Israel, political, historical, and economic contexts have resulted in institutional distrust. Institutional distrust, through social and economic intermediates, shapes human-animal contact networks on which pathogens such as *Brucella* spp. are transmitted between humans (purple shading) and food producing animals (beige shading).

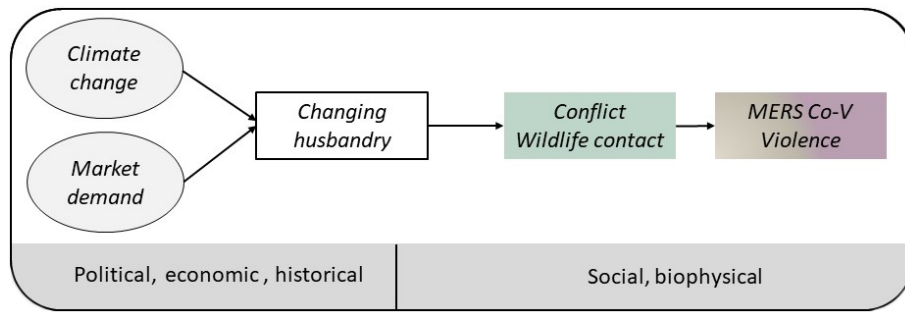

**Figure 5** Conceptual model developed for Case Study 3. Among pastoralist communities in Ethiopia, increasing market demand and climate change, which are shaped by political and economic contexts, are changing camel husbandry. Camel husbandry has deep historical roots, and shifts in husbandry intersect with social and biophysical contexts to drive conflict and increased wildlife contact, which ultimately impact both human and animal health.

| Publication                    | Framework objective and summary                                                                                                                                                                                                                                      | Critically-engaged? | Clear definition of environment?                                               |
|--------------------------------|----------------------------------------------------------------------------------------------------------------------------------------------------------------------------------------------------------------------------------------------------------------------|---------------------|--------------------------------------------------------------------------------|
| Baquero et al. (2021) (9)      | Core thesis focuses on marginalizing apparatuses which operate on humans, animals and ecosystems, and identifying structural alternatives for multispecies justice.<br><br><i><u>Name:</u> One Health of Peripheries</i>                                             | Yes                 | Yes; environment is ecosystem health                                           |
| Hardy and Standley (2022) (10) | Identifying commonalities with feminist and Queer theory: decomposing false binaries, challenging reductionism, and examining intersections                                                                                                                          | Yes                 | No                                                                             |
| Lerner and Berg (2014) (11)    | Redefining health and questioning the normative connotation behind the term “non-human animals.”                                                                                                                                                                     | Yes                 | Yes; environment is ecosystem health                                           |
| Rock et al. (2009) (12)        | Uses the idea of syndemics to examine the links between biology and social systems to align with other values for social change and achieve health for all. Focus is on developing prevention and intervention strategies, not examining the determinants of health. | Yes                 | No                                                                             |
| Sleeman et al. (2019) (13)     | Systems-based harm reduction approach to One Health interventions.                                                                                                                                                                                                   | No                  | Yes; ecosystem is a health bearer, and distinct from the environmental quality |
| Wallace et al (2015) (14)      | Empirical framework for studying structural causes of novel pathogen emergence. <i><u>Name:</u></i>                                                                                                                                                                  | Yes                 | Not explicitly; assumed to be                                                  |



|                                   |                                                                                                                                                                 |    |                                           |
|-----------------------------------|-----------------------------------------------------------------------------------------------------------------------------------------------------------------|----|-------------------------------------------|
|                                   | <i>Structural One Health</i>                                                                                                                                    |    | ecosystems                                |
| Woldehanna and Zimicki (2015) (7) | Framework for examining proximal determinants of human-animal contact (social, cultural, livelihood, etc.). <u>Name:</u> <i>Expanded One Health</i>             | No | No                                        |
| Zinsstag et al. (2009) (8)        | An extension of One Health, EcoHealth, systems biology, and socioecological systems conceptual thinking: <u>Name:</u> <i>Health in Socio-ecological Systems</i> | No | Yes; describe a socioecological continuum |

**Table 1:** Summary of publications reviewed
